# Supplementary material for: Templates of Lymph Node Dissection for Renal Cell Carcinoma: A Systematic Review of the Literature
Source: PubMed Central journal article supplement (PMC6306033; doi:10.3389/fsurg.2018.00076), 2018-12-19

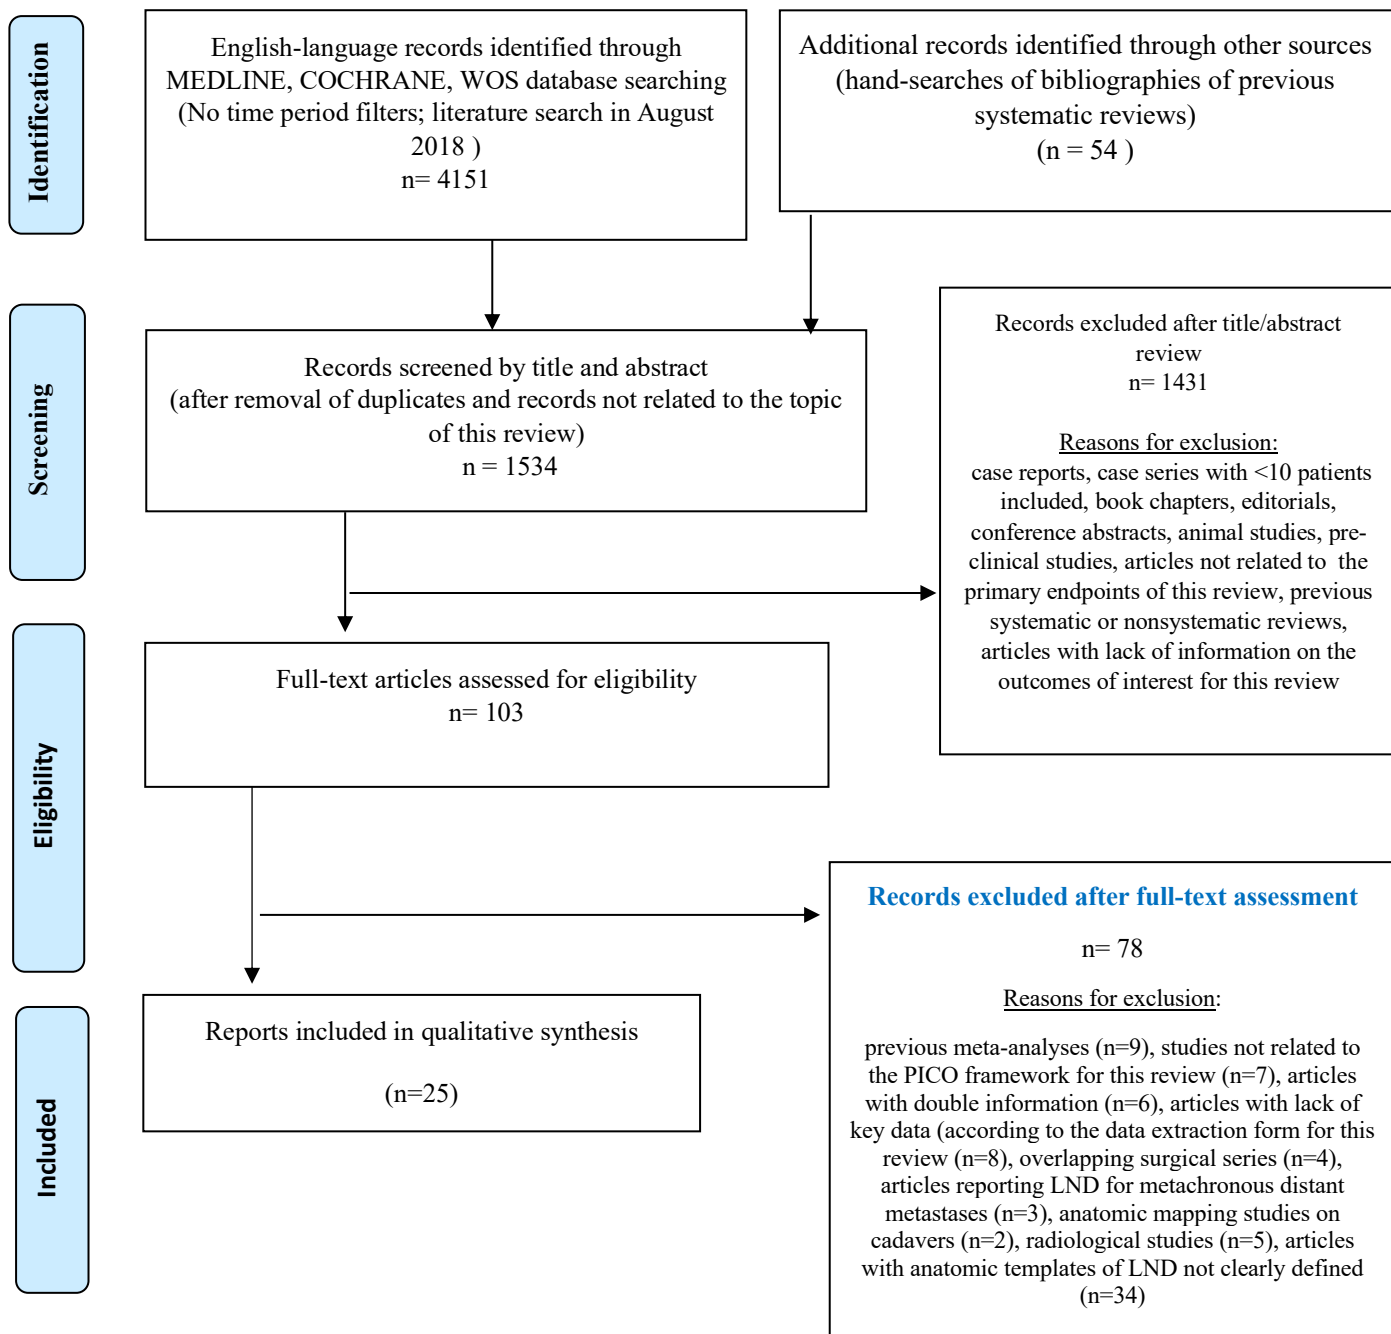

Supplement: Image_1.pdf [file Image_1.pdf]
